# Supplementary material for: Convergence of infectious and non-communicable disease epidemics in rural South Africa: a cross-sectional, population-based multimorbidity study
Source: PubMed Central journal article supplement (PMC8220132; doi:10.1016/s2214-109x(21)00176-5), 2021-06-15
Supplement: mmc2.pdf [file mmc2.pdf]

# THE LANCET

## Global Health

### Supplementary appendix 2

This appendix formed part of the original submission and has been peer reviewed. We post it as supplied by the authors.

Supplement to: Wong EB, Olivier S, Gunda R, et al. Convergence of infectious and non-communicable disease epidemics in rural South Africa: a cross-sectional, population-based multimorbidity study. *Lancet Glob Health* 2021; **9**: e967–76.

Supplementary Appendix

Convergence of infectious and non-communicable disease epidemics in rural South Africa

# Supplementary Appendix

This appendix has been provided by the authors to give readers additional information about their work.

Supplement to: Wong EB, Olivier S, Gunda R, Koole O, et al. Convergence of infectious and non-communicable disease epidemics in rural South Africa: a population-based multimorbidity study

Supplementary Appendix to Manuscript Entitled

**Convergence of infectious and non-communicable disease epidemics in rural South Africa:  
a population-based multimorbidity study**

Table of Contents

|                                                                                                          |    |
|----------------------------------------------------------------------------------------------------------|----|
| Vukuzazi Study Team.....                                                                                 | 3  |
| Supplemental Methods.....                                                                                | 7  |
| Eligibility and Recruitment .....                                                                        | 7  |
| Informed consent.....                                                                                    | 7  |
| Demographic data.....                                                                                    | 7  |
| Health questionnaire .....                                                                               | 7  |
| Blood pressure measurement.....                                                                          | 8  |
| Sampling weights.....                                                                                    | 8  |
| Supplemental Figures and Tables                                                                          |    |
| Figure S1. Population structure of eligible individuals and Vukuzazi participants.....                   | 9  |
| Figure S2. Outcome of recruitment efforts by age and sex.....                                            | 10 |
| Table S1. Demographic characteristics of the eligible population, participants and non-participants..... | 11 |
| Table S2. Combinations of diseases contributing to multimorbidity in Vukuzazi.....                       | 12 |
| Table S3. Details of control states for four diseases assessed in Vukuzazi.....                          | 13 |
| References .....                                                                                         | 14 |

**Vukuzazi Team: Staff who significantly contributed to the implementation and conduct of Vukuzazi.**

\* Denotes team members who were closely involved with the design, implementation and oversight of Vukuzazi.

| <b>Name</b>               | <b>Role</b>                           |
|---------------------------|---------------------------------------|
| *Deenan Pillay            | Principal Investigator (2017-2019)    |
| *Willem Hanekom           | Principal Investigator (2019-present) |
| *Emily Wong               | Co-Principal Investigator             |
| *Mark Siedner             | Co-Principal Investigator             |
| *Olivier Koole            | Co-Principal Investigator (2017-2019) |
| *Thumbi Ndung'u           | Co-investigator                       |
| *Thandeka Khoza           | Co-investigator (2019-present)        |
| *Kobus Herbst             | Co-investigator                       |
| *Kathy Baisley            | Co-investigator                       |
| *Janet Seeley             | Co-investigator                       |
| *Alison Grant             | Co-investigator                       |
| *Resign Gunda             | Programme Manager                     |
| *Ashmika Surujdeen        | Study Coordinator                     |
| *Theresa Smit             | Head: Diagnostic Research             |
| *Dickman Gareta           | Head: Research Data Management        |
| *Day Munatsi              | Head: Research Data Systems           |
| *Ngcebo Mhlongo           | Study Physician                       |
| *Sanah Bucibo             | Lead Nurse                            |
| *Tshwaraganang Modise     | Research Data Manager                 |
| *Stephen Olivier          | Statistician                          |
| *Gregory Ording-Jespersen | Laboratory Data Supervisor            |
| *Innocentia Mpfana        | Diagnostic Laboratory Manager         |
| *Jaco Dreyer              | Senior Research Data Manager          |
| *Siyabonga Nxumalo        | Research Data Manager                 |
| *Khadija Khan             | Biorepository Manager                 |
| *Zizile Sikhosana         | Somkhele Laboratory Supervisor        |
| *Sashen Moodley           | Microbiology Laboratory Supervisor    |
| *Hollis Shen              | Head: Exploratory Research Division   |
| Kennedy Nyamande          | Pulmonology Consultant                |
| Mosa Suleman              | Pulmonology Consultant                |
| Jaikrishna Kalideen       | Radiologist                           |
| Ramesh Jackpersad         | Radiologist                           |
| Kgaugelo Moropane         | Radiographer                          |
| Boitsholo Mfolo           | Radiographer                          |
| Khabonina Malomane        | Radiographer                          |
| Hlolisile Khumalo         | Nursing Manager                       |
| Nompilo Buthelezi         | Training Coordinator                  |
| Nozipho Mbonambi          | Professional Nurse                    |
| Hloniphile Ngubane        | Professional Nurse                    |

## Supplementary Appendix

## Convergence of infectious and non-communicable disease epidemics in rural South Africa

|                            |                                        |
|----------------------------|----------------------------------------|
| Thokozani Simelane         | Professional Nurse                     |
| Khanyisani Buthelezi       | Professional Nurse                     |
| Sphiwe Ntuli               | Professional Nurse                     |
| Nombuyiselo Zondi          | Professional Nurse                     |
| Siboniso Nene              | Professional Nurse                     |
| Bongumenzi Ndlovu          | Enrolled Nurse                         |
| Talente Ntimbane           | Enrolled Nurse                         |
| Mbali Mbuyisa              | Enrolled Nurse                         |
| Xolani Mkhize              | Enrolled Nurse                         |
| Melusi Sibiya              | Enrolled Nurse                         |
| Ntombiyenkosi Ntombela     | Enrolled Nurse                         |
| Mandisi Dlamini            | Enrolled Nurse                         |
| Hlobisile Chonco           | Enrolled Nurse                         |
| Hlengiwe Dlamini           | Enrolled Nurse                         |
| Doctar Mlambo              | Enrolled Nurse                         |
| Nonhlanhla Mzimela         | Enrolled Nurse                         |
| Zinhle Buthelezi           | Enrolled Nurse                         |
| Zinhle Mthembu             | Enrolled Nurse                         |
| Thokozani Bhengu           | Enrolled Nurse                         |
| Sandile Mthembu            | Enrolled Nurse                         |
| Phumelele Mthethwa         | Enrolled Nurse                         |
| Zamashandu Mbatha          | Enrolled Nurse                         |
| Welcome Petros Mthembu     | Enrolled Nurse                         |
| Anele Mkhwanazi            | Clinical Research Assistant Supervisor |
| Mandlakayise Zikhali       | Clinical Research Assistant Supervisor |
| Phakamani Mkhwanazi        | Clinical Research Assistant            |
| Ntombiyenhlanhla Mkhwanazi | Clinical Research Assistant            |
| Rose Myeni                 | Clinical Research Assistant            |
| Fezeka Mfeka               | Clinical Research Assistant            |
| Hlobisile Gumede           | Clinical Research Assistant            |
| Nonceba Mfeka              | Clinical Research Assistant            |
| Ayanda Zungu               | Clinical Research Assistant            |
| Hlobisile Gumede           | Clinical Research Assistant            |
| Nonhlanhla Mfekayi         | Clinical Research Assistant            |
| Smangaliso Zulu            | Clinical Research Assistant            |
| Mzamo Buthelezi            | Clinical Research Assistant            |
| Senzeni Mkhwanazi          | Clinical Research Assistant            |
| Mlungisi Dube              | Clinical Research Assistant            |
| Philippa Mathews           | Clinical Governance                    |
| Siphephelo Dlamini         | AHRI Nursing Manager                   |
| Hosea Kambonde             | IT Systems Developer                   |
| Lindani Mthembu            | Information Technology Assistant       |
| Seneme Mchunu              | Information Technology Assistant       |
| Sibahle Gumbi              | Research Admin Assistant               |
| Tumi Madolo                | Research Data Manager                  |

## Supplementary Appendix

## Convergence of infectious and non-communicable disease epidemics in rural South Africa

|                        |                                               |
|------------------------|-----------------------------------------------|
| Thengokwakhe Nkosi     | Driver                                        |
| Sibusiso Mkhwanazi     | Driver                                        |
| Sibusiso Nsibande      | Driver                                        |
| Mpumelelo Steto        | Driver                                        |
| Sibusiso Mhlongo       | Driver                                        |
| Velile Vellem          | Driver                                        |
| Pfarelo Tshivase       | Driver                                        |
| Jabu Kwinda            | Driver                                        |
| Bongani Magwaza        | General Worker                                |
| Siyabonga Nsibande     | General Worker                                |
| Skhumbuzo Mthombeni    | General Worker                                |
| Sphiwe Clement Mthembu | General Worker                                |
| Antony Rapulana        | Laboratory Technologist                       |
| Jade Cousins           | Laboratory Technologist                       |
| Thabile Zondi          | Laboratory Technologist                       |
| Nagavelli Padayachi    | Laboratory Technologist                       |
| Freddy Mabetlela       | Laboratory Technologist                       |
| Simphiwe Ntshangase    | Laboratory Technician/LIMS Administrator      |
| Nomfundo Luthuli       | Laboratory Technician                         |
| Sithembile Ngcobo      | Laboratory Technologist                       |
| Kayleen Brien          | Laboratory Technologist                       |
| Sizwe Ndlela           | Laboratory Technician                         |
| Nomfundo Ngema         | Laboratory Technician                         |
| Nokukhanya Ntshakala   | Laboratory Technician                         |
| Anupa Singh            | Laboratory Technician                         |
| Rochelle Singh         | Laboratory Technician                         |
| Logan Pillay           | Laboratory Technician                         |
| Kandaseelan Chetty     | Laboratory Technician                         |
| Ashentha Govender      | Laboratory Technician                         |
| Pamela Ramkalawon      | Laboratory Research Technician                |
| Nondumiso Mabaso       | Laboratory Intern                             |
| Kimeshree Perumal      | Laboratory Intern                             |
| Senamile Makhari       | Biorepository Laboratory Technician           |
| Nondumiso Khuluse      | Biorepository Laboratory Technician           |
| Nondumiso Zitha        | Biorepository Research Assistant              |
| Hlengiwe Khathi        | Biorepository Research Assistant              |
| Mbuti Mofokeng         | Clinical Specimen Driver/Laboratory Assistant |
| Nomathamsanqa Majazi   | Public Engagement                             |
| Nceba Gqaleni          | Public Engagement                             |
| Hannah Keal            | Communications                                |
| Phumla Ngcobo          | Communications                                |
| Costa Criticos         | Operational Oversight                         |
| Raynold Zondo          | Operational Oversight                         |
| Dilip Kalyan           | Operational Oversight                         |
| Clive Mavimbela        | Operational Oversight                         |

Supplementary Appendix

Convergence of infectious and non-communicable disease epidemics in rural South Africa

|                 |               |
|-----------------|---------------|
| Anand Ramnanan  | Procurement   |
| Sashin Harilall | Grants Office |

## **Supplemental Methods**

### *Additional Methodological Details*

Eligibility and Recruitment. Eligibility criteria included age of at least 15 years on the day of recruitment and ongoing residency in the southern part of the AHRI demographic surveillance area. Eligible individuals were enumerated from the surveillance database on a weekly basis to ensure that most up-to-date data were used to reduce non-contact resulting from migration and death. A resident member of a household was defined as an individual who had slept the majority of nights in the preceding 4 months in the homestead occupied by the household. Study field workers visited households to explain the Vukuzazi survey, provide a written description of the study, and invite eligible household members to participate. Survey field workers provided registered invitation cards to potential participants in person or by proxy (issued to a household informant for other eligible household residents who were not home at the time of the recruiter's visit). Individuals in possession of registered invitation cards were eligible to attend the health camp on any subsequent date.

Informed consent. Upon presentation to the health camp, potential participants received additional written and verbal explanation of survey procedures, underwent assessment of capacity, individual informed consent and enrollment into the survey. All participants completed a formal written informed consent process that included consent for disease testing and return of results, storage and future use of biobanked specimens, permission for genetic testing in the future, and permission to be re-contacted for additional sub-studies and longitudinal follow-up. Adolescent participants who were younger than 18 years of age additionally required written assent for participation from their parent or guardian.

Demographic data. Demographic information about Vukuzazi participants and non-participants (including marital status, employment status, level of education attained, location of residence and household access to running water) were obtained from the most recent demographic survey. Membership in the labour force and employment status were defined using the strict definition of unemployment as defined by Statistics South Africa.(1)

Health questionnaire: At the Vukuzazi health camp, a study nurse administered a personal health history questionnaire that included personal history of HIV (including date and result of most recent HIV test and personal history of antiretroviral therapy), personal history of tuberculosis (including date of most recent TB treatment, current TB treatment status and ascertainment of the presence and duration of the four cardinal symptoms of TB (cough, fever, night sweats and weight loss) as designated in WHO TB Prevalence Survey methodology,(2) personal history of diabetes (whether the condition had been



diagnosed and whether the participant was actively receiving antidiabetes therapy), and personal history of hypertension (whether the condition had been diagnosed and whether the participant was actively receiving antihypertensive therapy).

Blood pressure measurement. Systolic and diastolic blood pressure were measured using automated devices (Welch Allyn) three times at 15 minute intervals when participants were comfortably seated and had been sitting with their legs uncrossed and feet on the ground for at least 15 minutes prior to the first measurement, according to the WHO STEPS protocol.(3) Small adult, adult, large adult and extra-large adult blood pressure cuffs were selected based on measured arm circumference (22-26cm, 27-34cm, 35-44cm, 45-52cm respectively). The average of the second and third systolic and diastolic measurements was used to define blood pressure for the analysis.

Statistical approaches. Inverse probability weights, to account for study non-participation, were calculated as the inverse probability of participation in the study, using a logistic regression model including all eligible individuals in the catchment area, with covariates for age groups (in 10 year bands) and sex. The inverse of the predicted probability from the regression model was used as the weight. Unweighted frequencies of multimorbidity categories in 1 year age bands were used to visualize the spectrum of health and across the adult lifespan. Since all resident individuals in the surveyed area of the PIPSA were eligible for the study, sampling weights were not applied in the calculation of population prevalence estimates. Continuous surface maps of disease and multimorbidity prevalence were generated using kernel interpolation method with a moving two-dimensional Gaussian kernel of a 3-km search radius which has been extensively validated in our setting.(4-7) The search radius was determined using a spatial variogram (constructed using HIV prevalence estimates aggregated by administrative ward), which showed there to be clear spatial dependence in the resulting HIV prevalence estimates within a distance of 3km whereafter the dependence ceased. The large sample size for this study meant that the resulting estimates were robust to the effects of random noise. For consistency and ease of comparison we applied the same technique and search radius to all four diseases.

**Supplementary Figures and Tables**

**Figure S1. Population structure of eligible individuals and Vukuzazi participants.**  
Population pyramid of eligible residents of the AHRI demographic surveillance area (no outline) and of Vukuzazi participants (black outline) by age and sex strata.

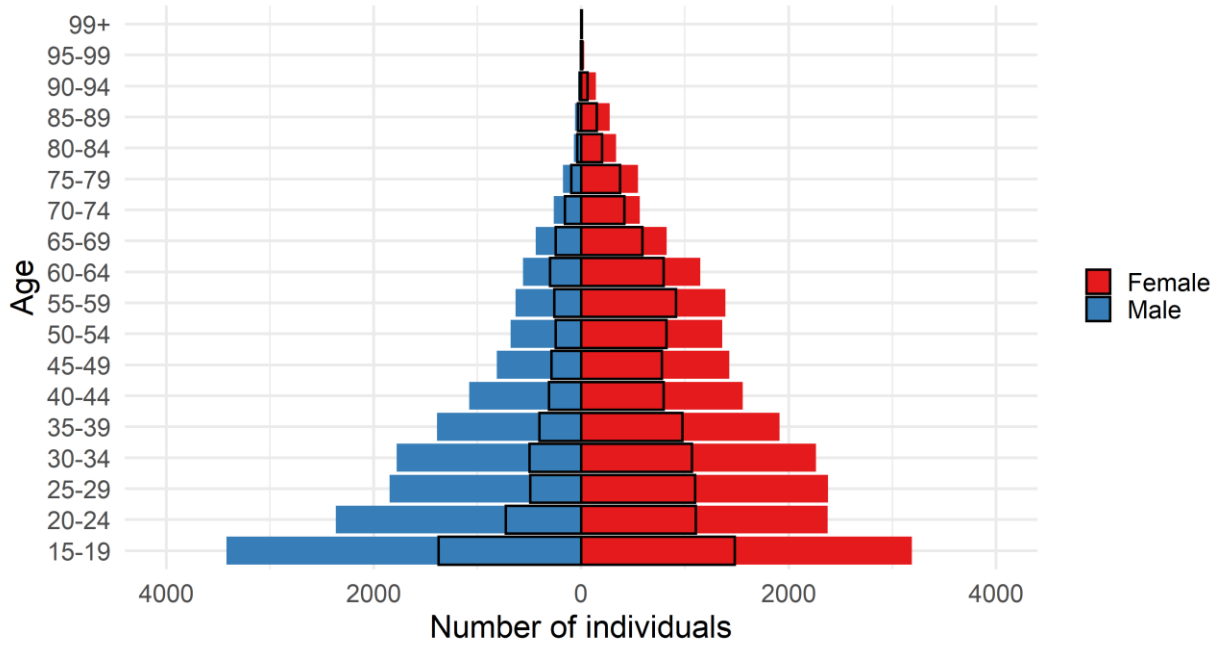

**Figure S2. Outcome of recruitment efforts by age and sex.** The percentage of eligible population whom the study team were unable to contact (blue), who refused further participation after hearing about the nature of the study (purple), who accepted an invitation card but did not attend Vukuzazi (light green) and who attended the Vukuzazi mobile health camp (dark green).

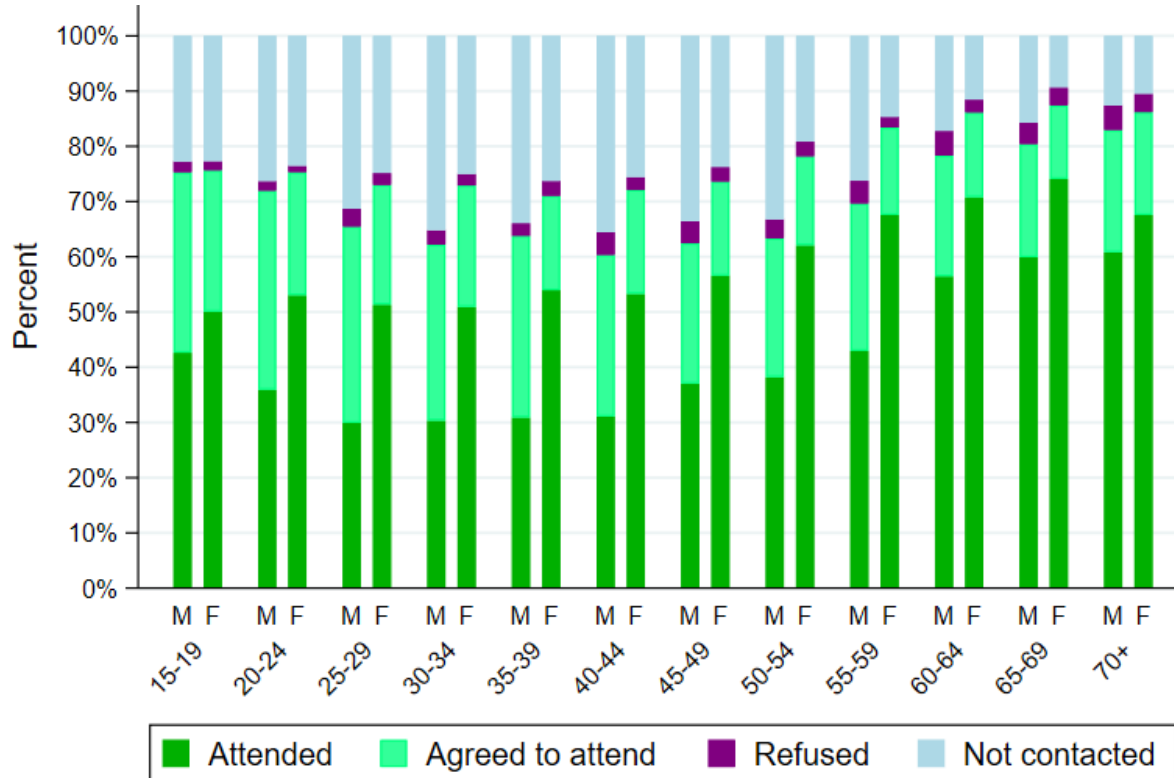

**Table S1. Demographic characteristics of the eligible population, participants and non-participants.**

|                                      | <b>Eligible population<br/>(N=34721)</b> | <b>Vukuzazi participants<br/>(N=17118)</b> | <b>Vukuzazi non-participants<br/>(N=17603)</b> | <b>p-value<sup>1</sup></b> |
|--------------------------------------|------------------------------------------|--------------------------------------------|------------------------------------------------|----------------------------|
| <b>Age group</b>                     | <b>n=34721</b>                           | <b>n=17118</b>                             | <b>n=17603</b>                                 | <b>&lt;0.000</b>           |
| <25                                  | 10294 (29.6%)                            | 4684 (27.4%)                               | 5610 (31.9%)                                   |                            |
| 25-34                                | 7523 (21.7%)                             | 3155 (18.4%)                               | 4368 (24.8%)                                   |                            |
| 35-44                                | 5612 (16.2%)                             | 2489 (14.5%)                               | 3123 (17.7%)                                   |                            |
| 45-54                                | 4102 (11.8%)                             | 2123 (12.4%)                               | 1979 (11.2%)                                   |                            |
| 55-64                                | 3617 (10.4%)                             | 2270 (13.3%)                               | 1347 (7.7 %)                                   |                            |
| >65                                  | 3573 (10.3%)                             | 2397 (14.0%)                               | 1176 (6.7 %)                                   |                            |
| <b>Gender</b>                        | <b>n=34721</b>                           | <b>n=17118</b>                             | <b>n=17603</b>                                 | <b>&lt;0.000</b>           |
| Male                                 | 14402 (41.5%)                            | 5500 (32.1%)                               | 8902 (50.6%)                                   |                            |
| Female                               | 20319 (58.5%)                            | 11618 (67.9%)                              | 8701 (49.4%)                                   |                            |
| <b>Education</b>                     | <b>n=34580</b>                           | <b>n=17076</b>                             | <b>n=17504</b>                                 | <b>&lt;0.000</b>           |
| None                                 | 8076 (23.4%)                             | 4320 (25.3%)                               | 3756 (21.5%)                                   |                            |
| Less than complete secondary         | 11402 (33.0%)                            | 6409 (37.5%)                               | 4993 (28.5%)                                   |                            |
| Complete secondary and above         | 15102 (43.7%)                            | 6347 (37.2%)                               | 8755 (50.0%)                                   |                            |
| <b>Marital Status</b>                | <b>n=29803</b>                           | <b>n=14839</b>                             | <b>n=14964</b>                                 | <b>&lt;0.000</b>           |
| Single                               | 7566 (25.4%)                             | 3567 (24.0%)                               | 3999 (26.7%)                                   |                            |
| Married/Living as married            | 19041 (63.9%)                            | 9185 (61.9%)                               | 9856 (65.9%)                                   |                            |
| Seperated/Widowed/Divorced           | 3196 (10.7%)                             | 2087 (14.1%)                               | 1109 (7.4 %)                                   |                            |
| <b>Employment Status<sup>2</sup></b> | <b>n=15746</b>                           | <b>n=6516</b>                              | <b>n=9230</b>                                  | <b>&lt;0.000</b>           |
| Unemployed <sup>3</sup>              | 6959 (44.2%)                             | 3653 (56.1%)                               | 3306 (35.8%)                                   |                            |
| Employed                             | 8787 (55.8%)                             | 2863 (43.9%)                               | 5924 (64.2%)                                   |                            |
| <b>Residence Location</b>            | <b>n=34531</b>                           | <b>n=17026</b>                             | <b>n=17505</b>                                 | <b>&lt;0.000</b>           |
| Urban                                | 2862 (8.3 %)                             | 946 (5.6 %)                                | 1916 (10.9%)                                   |                            |
| Peri-urban                           | 11720 (33.9%)                            | 5509 (32.4%)                               | 6211 (35.5%)                                   |                            |
| Rural                                | 19949 (57.8%)                            | 10571 (62.1%)                              | 9378 (53.6%)                                   |                            |

<sup>1</sup>Chi-squared test of difference in each demographic category between Vukuzazi participants and non-participants. <sup>2</sup>Employment status calculated among members of the resident population in the labour force. <sup>3</sup>Department of Statistics South Africa's strict definition of unemployment (Ref 1).

**Table S2. Combinations of diseases contributing to multimorbidity in Vukuzazi.** Table includes all participants who enrolled between May 2018-December 2019 (n = 17,118). Glu = Elevated blood glucose; BP = elevated blood pressure; Missing = participants who did not complete disease screening activities for all four diseases.

| <b>Disease combinations</b> | <b>N</b> | <b>percent</b> |
|-----------------------------|----------|----------------|
| No disease                  | 7553     | 44.12          |
| Glu                         | 385      | 2.25           |
| Glu_BP                      | 881      | 5.15           |
| Glu_BP_TB                   | 14       | 0.08           |
| Glu_TB                      | 9        | 0.05           |
| HIV                         | 4380     | 25.59          |
| HIV_Glu                     | 162      | 0.95           |
| HIV_Glu_BP                  | 194      | 1.13           |
| HIV_Glu_BP_TB               | 1        | 0.01           |
| HIV_Glu_TB                  | 6        | 0.04           |
| HIV_BP                      | 945      | 5.52           |
| HIV_BP_TB                   | 15       | 0.09           |
| HIV_TB                      | 93       | 0.54           |
| BP                          | 2319     | 13.55          |
| BP_TB                       | 26       | 0.15           |
| TB                          | 69       | 0.4            |
| Missing                     | 66       | 0.39           |

**Table S3. Details of control states for four diseases assessed in Vukuzazi.**

|                                                                             | <b>HIV</b>  |               | <b>Elevated blood glucose</b> |               | <b>Elevated blood pressure</b> |               | <b>Active tuberculosis</b> |               |
|-----------------------------------------------------------------------------|-------------|---------------|-------------------------------|---------------|--------------------------------|---------------|----------------------------|---------------|
|                                                                             | N           | percent       | N                             | Percent       | N                              | Percent       | N                          | Percent       |
| Controlled<br>(Diagnosed,<br>On optimal<br>treatment)                       | 4526        | 78.1%         | 117                           | 7.1%          | 1866                           | 42.5%         | 69                         | 29.6%         |
| Uncontrolled<br>(Newly<br>diagnosed)                                        | 599         | 10.3%         | 415                           | 25.1%         | 764                            | 17.4%         | 164                        | 70.4%         |
| Uncontrolled<br>(Previously<br>diagnosed,<br>Not on<br>treatment)           | 151         | 2.6%          | 559                           | 33.8%         | 704                            | 16.0%         | 0                          | 0             |
| Uncontrolled<br>(Previously<br>Diagnosed,<br>On<br>suboptimal<br>treatment) | 520         | 9.0%          | 561                           | 34.0%         | 1061                           | 24.1%         | 0                          | 0             |
| <b>Total</b>                                                                | <b>5796</b> | <b>100,0%</b> | <b>1652</b>                   | <b>100.0%</b> | <b>4395</b>                    | <b>100.0%</b> | <b>233</b>                 | <b>100.0%</b> |

## References

1. Quarterly Labour Force Survey, Statistical Release Pretoria, South Africa: Department of Statistics South Africa 23 June 2020.
2. Tuberculosis prevalence surveys: a handbook. Geneva, Switzerland: World Health Organization March 2011.
3. The WHO STEPwise approach to noncommunicable disease risk factor surveillance (STEPS) - Instrument. Geneva, Switzerland: World Health Organization. Contract No.: v3.2.
4. Tanser F, Barnighausen T, Cooke GS, Newell ML. Localized spatial clustering of HIV infections in a widely disseminated rural South African epidemic. *International journal of epidemiology*. 2009;38(4):1008-16.
5. Tanser F, Vandormael A, Cuadros D, Phillips AN, de Oliveira T, Tomita A, et al. Effect of population viral load on prospective HIV incidence in a hyperendemic rural African community. *Science translational medicine*. 2017;9(420).
6. Vandormael A, Cuadros D, Kim HY, Barnighausen T, Tanser F. The state of the HIV epidemic in rural KwaZulu-Natal, South Africa: a novel application of disease metrics to assess trajectories and highlight areas for intervention. *International journal of epidemiology*. 2020;49(2):666-75.
7. Waller LA, Gotway CA. *Applied Spatial Statistics for Public Health Data*: John Wiley & Sons; 2004.
